# Supplementary material for: Cytomegalovirus Infection of the Rat Developing Brain In Utero Prominently Targets Immune Cells and Promotes Early Microglial Activation
Source: PubMed Central journal article supplement (PMC4966896; doi:10.1371/journal.pone.0160176), 2016-07-29
Supplement: pone.0160176.s001.pdf [file pone.0160176.s001.pdf]

## S1 file - Supporting information online.

### Figure A. Morphological Analysis of control brains at various developmental stages.

MEM (the vehicle) was injected intraventricularly at E15. Coronal sections of brain areas were observed at various developmental time points (E17, E20 and P1;  $n = 18, 9$  and  $31$  brains respectively) using confocal microscopy (blue: Hoechst nucleic acid staining). No GFP signal was ever observed. Areas are shown upon a rostrocaudal axis, from top to bottom. White bar:  $100\ \mu\text{m}$ ; yellow bar:  $30\ \mu\text{m}$ .

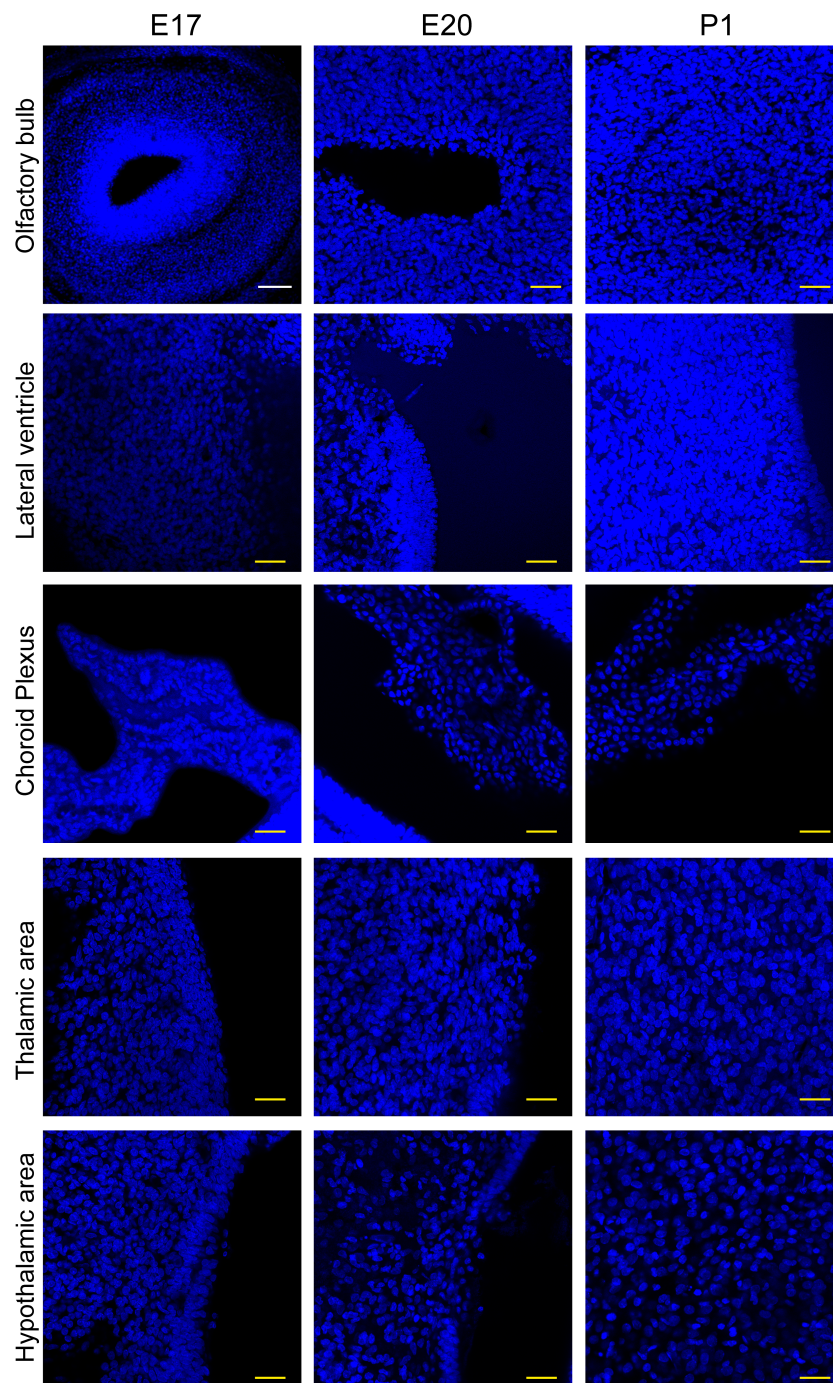

**Figure B. Detection of RCMV-infected cells with GFP and with R44 antibodies, and of *GFP* and *R44* gene expressions.**

(A) RCMV-infected cells were detected at E17 (choroid plexi) and at P1 (lateral ventricles). Cells were also detected with antibodies against R44 early/late viral protein (red). Note that GFP was more effective in detecting RCMV-infected cells. Nuclei staining: Hoechst (blue). Yellow bar: 30  $\mu\text{m}$  (B) qRT-PCR experiments demonstrated dramatic increase in the relative mRNA expressions of *GFP* and *R44* genes in the RCMV-infected brains, from E16 / E17 to P1.

**A**

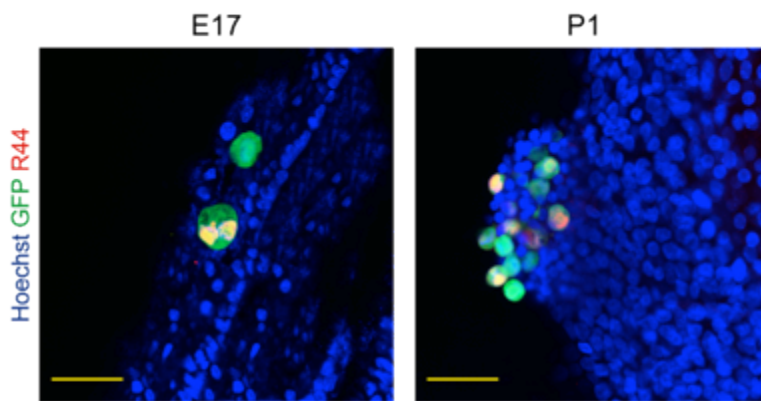

**B**

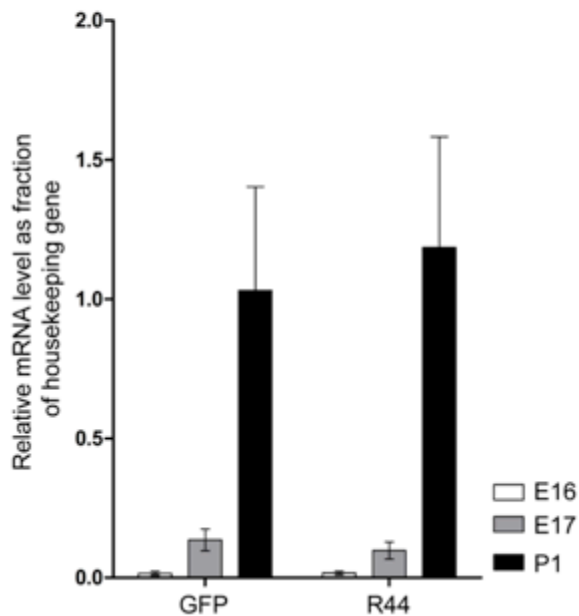

**Figure C. Colocalization of RCMV-infected brain cells with CD45 and Iba1 markers at P1.**

The subventricular zone of the lateral ventricles (A) and the choroid plexi (B) of the RCMV-infected brains were analyzed at P1 after immunohistochemistry on coronal slices, using confocal microscopy after GFP-expressing RCMV infection at E15. Most GFP+ (infected) cells (green) showed expression of CD45 (red) and Iba1 (white). For each brain area, the bottom pictures represent high magnifications (scale bar: 50  $\mu$ m) of the corresponding boxed area taken from the corresponding top picture (scale bar: 100  $\mu$ m). Arrows indicate typical examples of colocalizations of GFP, CD45, and Iba1 signals.

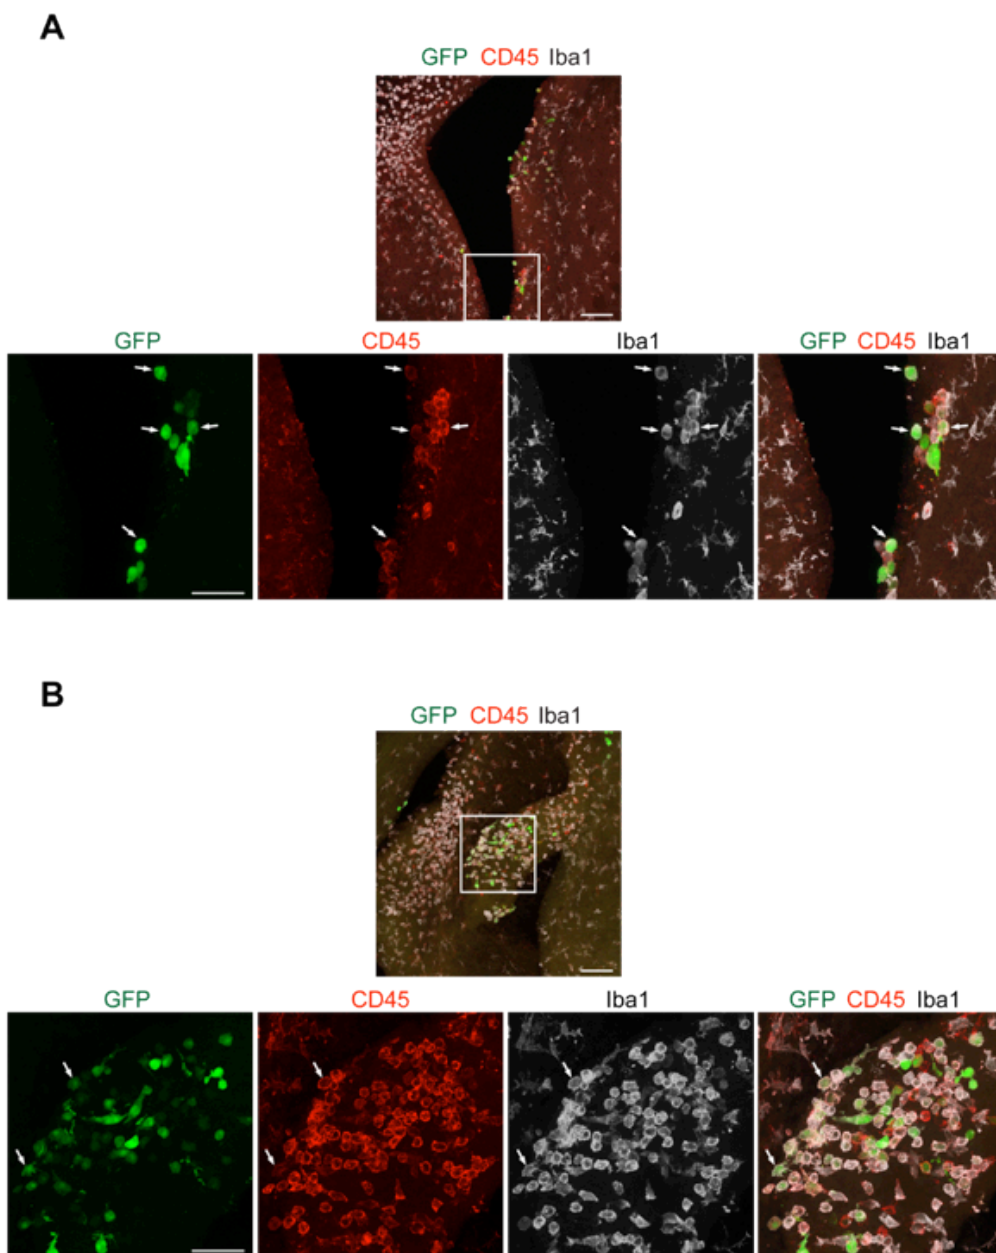

**Figure D. Colocalizations of RCMV-infected brain cells with NG2, S100beta and AQP1 markers at P1.**

RCMV-infected brains were analyzed at P1 after immunohistochemistry on coronal slices, using confocal microscopy after GFP-expressing RCMV infection at E15. Some RCMV-infected cells (GFP, green) showed (A-C) coexpression of CD45 (red) and NG2 (white) in the subventricular zone of the lateral ventricles, or (D) of S100-beta (red) or (E) of AQP1 (red) in the choroid plexus. (B) and (C) represent high-magnification pictures of the corresponding boxed areas shown in (A). Arrows represent typical colocalizations. Arrowheads (B) point to GFP+ cells that colocalize with CD45 but not with NG2. Scale bars (A): 100  $\mu\text{m}$  ; (B-E): 50  $\mu\text{m}$ .

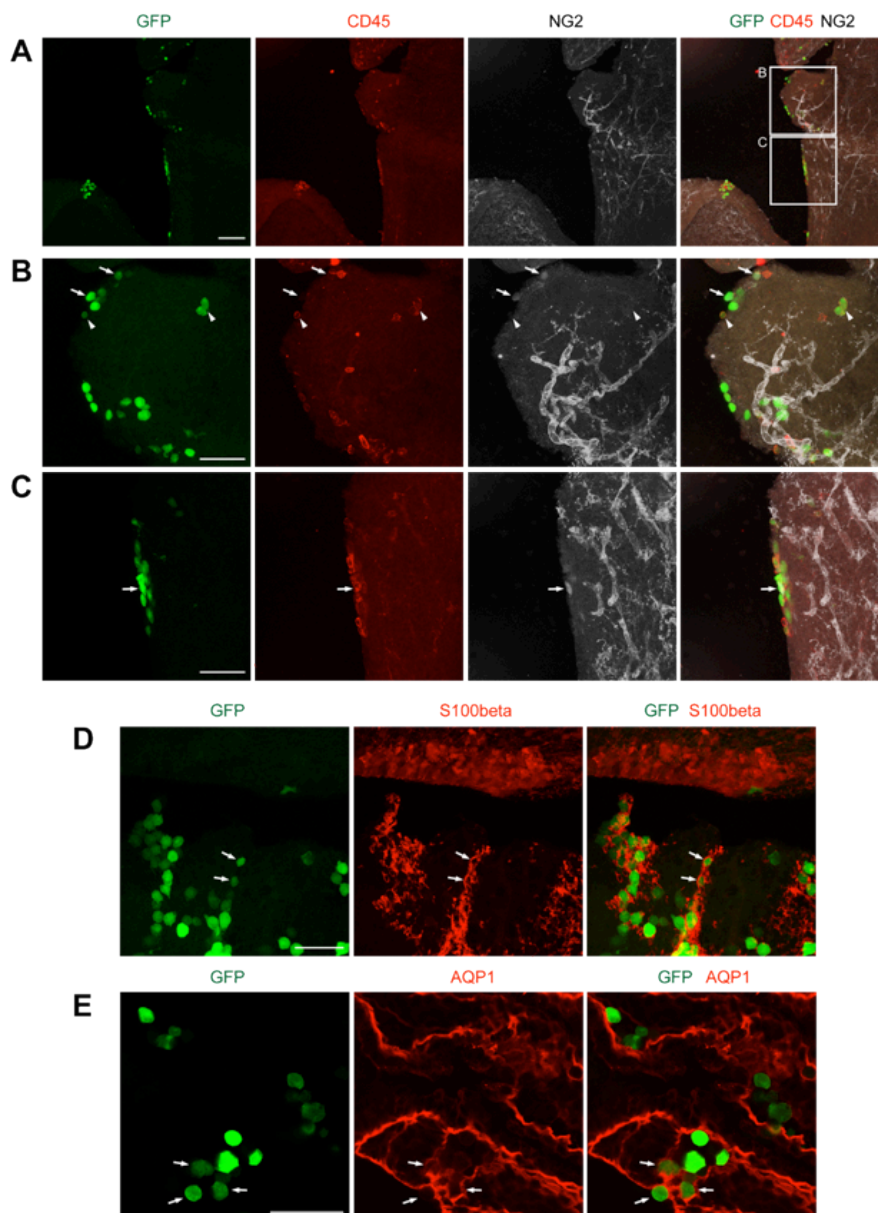



**Figure E. Lack of infection and altered morphology of radial glial cells in RCMV-infected brains.**

RCMV-infected brains were analyzed at P1 after immunohistochemistry on coronal slices, using confocal microscopy after GFP-expressing RCMV infection at E15. (A) Orthogonal view of RCMV-infected cells that were detected closely adjacent to radial glial cells (nestin+; red) in the ventricular zone of lateral ventricles. No colocalization of GFP and nestin was observed. (B) The morphology of the radial glia was analyzed at P1 in mock (MEM, top) and RCMV-infected (bottom) brains. Note that the altered structure of radial glia (Vimentin, red) was observed (arrows) only in the presence of closely adjacent RCMV-infected cells (GFP, green) whereas the remaining ventricular walls remain unaltered. For each condition small pictures on the right represent magnifications of the corresponding boxes (dorsal telencephalon and ventral telencephalon, respectively) taken from the left pictures of the lateral ventricles. Hoechst (blue): nuclear staining. White scale bar: 200 $\mu$ m; yellow scale bar: 30  $\mu$ m.

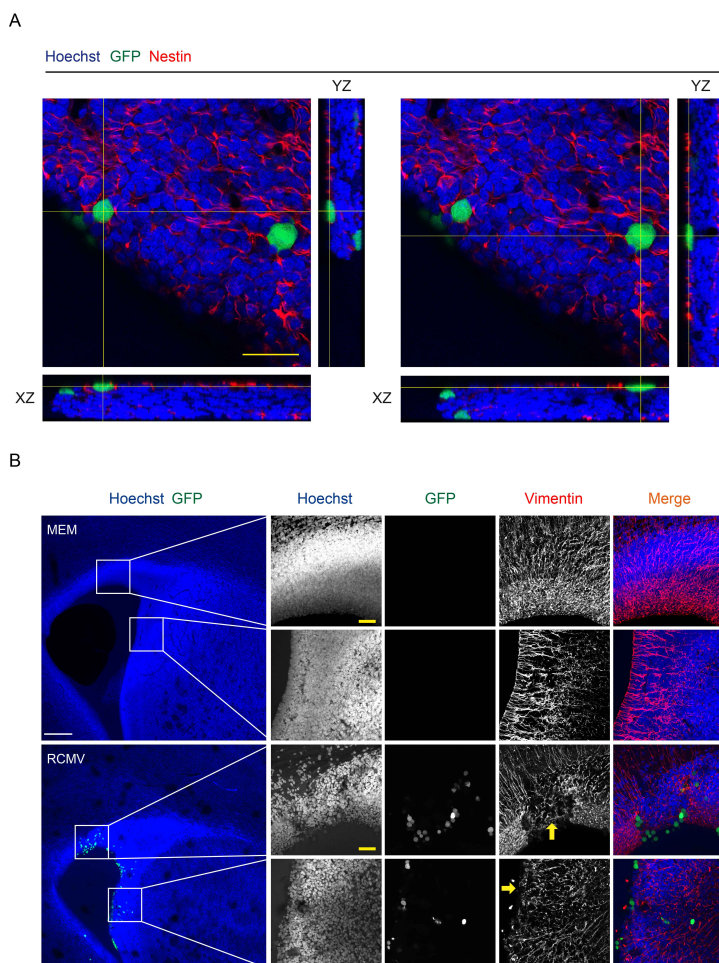

**Figure F. Dysexpression of various cytokines and chemokines genes upon RCMV infection of the developing brain.**

Bar graphs represent log<sub>2</sub>-fold changes values in RCMV-infected brains (n=8 for each stage: E16, E17 and P1) vs control (MEM) brains (n=8 for each stage). Relative quantification was performed using *RPL-19* as reference gene. Data were analyzed at each stage with Mann-Whitney test with Bonferroni correction for multiple testing to check for statistically significant differences between RCMV and control conditions (\*p < 0.0045, \*\*p < 0.0009)..

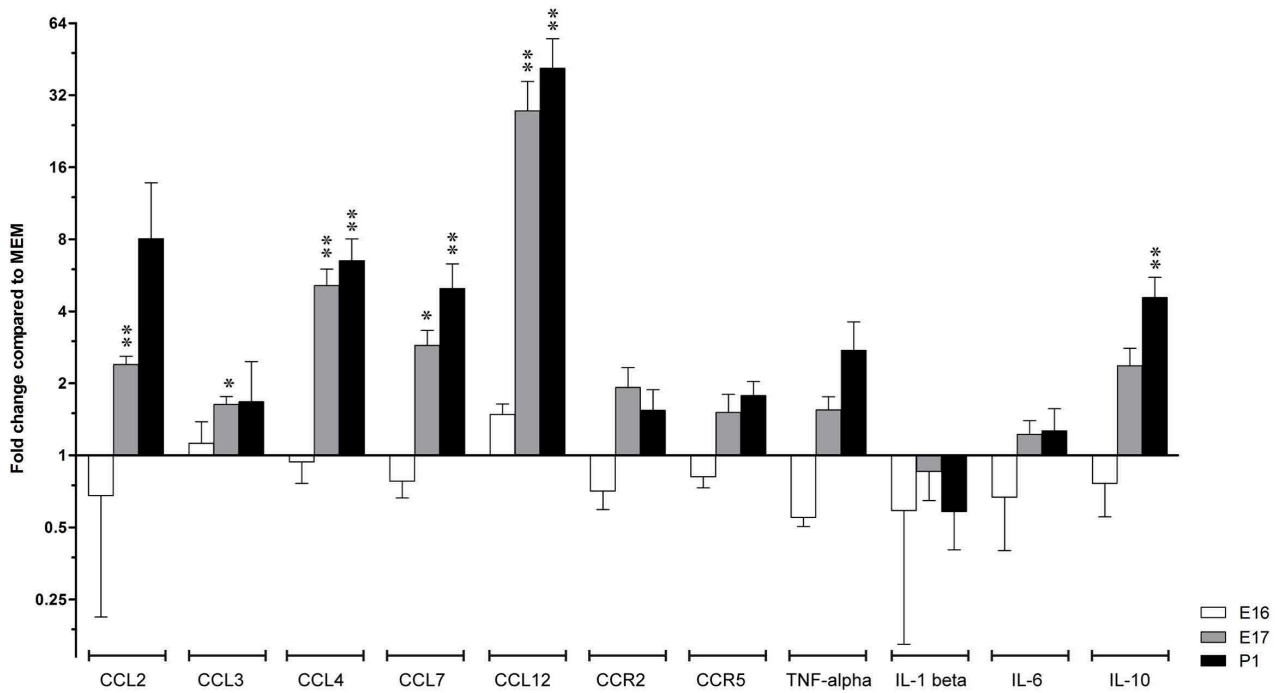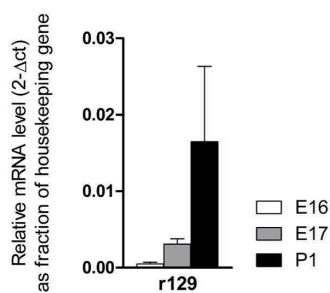

**Figure G. Evolution of cell distribution from E17 to P1 in CMV-infected brains by flow cytometry analysis.**

Total leukocytes (CD45 events) were gated for CD45 and either Cd11b/c or CD11b expressions and further characterized for CD3 and RT1B or for CCR2 expressions, respectively, as reported in Fig. 4 (E17) and Fig. 5 (P1). For each cell type, relative quantification was done by normalizing the proportion of cells to the average value of the control situation at the corresponding developmental stage. Data were analyzed with Mann-Whitney test to check for statistically significant differences between E17 and P1 (ns: non significant; \*\*\*\* p < 0.0001).

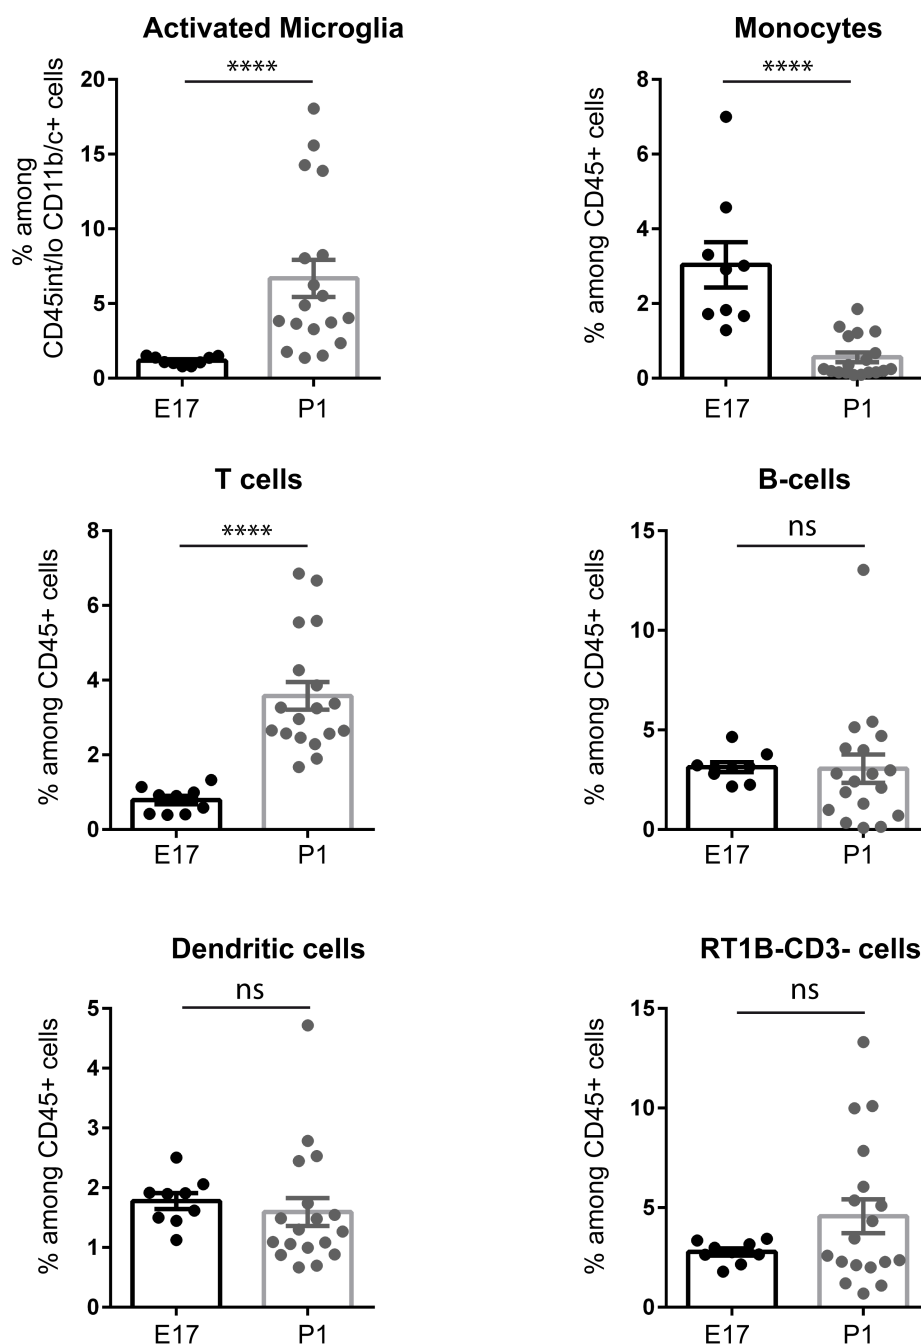

**Table A. List of antibodies used in immunohistochemistry and flow cytometry.**

| Antibody                                 | Dilution | Supplier                                                                               |
|------------------------------------------|----------|----------------------------------------------------------------------------------------|
| Mouse monoclonal anti-RCMV Rmab-8        | 1:250    | G. Grauls (Department of Medical Microbiology, Maastricht University, The Netherlands) |
| Rabbit polyclonal anti Iba-1             | 1:500    | Wako chemicals USA                                                                     |
| Mouse monoclonal anti rat CD68 clone ED1 | 1:200    | Merck Millipore                                                                        |
| Mouse monoclonal anti-Vimentin           | 1:300    | Merck Millipore                                                                        |
| Mouse monoclonal anti-NeuN               | 1:500    | Merck Millipore                                                                        |
| Rabbit polyclonal anti Ki-67             | 1:300    | Merck Millipore                                                                        |
| rabbit polyclonal anti aquaporine-1      | 1:500    | Merck Millipore                                                                        |
| Mouse monoclonal anti CD45               | 1:100    | BD Biosciences                                                                         |
| Mouse monoclonal anti-Nestin             | 1:300    | BD Biosciences                                                                         |
| Mouse anti rat CD45-V450                 | 1:25     | BD Biosciences                                                                         |
| Mouse anti rat CD11b-APC                 | 1:100    | BD Biosciences                                                                         |
| Mouse anti rat CD11b/c-PE-Cy7            | 1:100    | BD Biosciences                                                                         |
| Mouse anti rat CD32 (FcγII receptor)     | -        | BD Biosciences                                                                         |
| Mouse anti rat CD3-BV605                 | 1:200    | BD Biosciences                                                                         |
| Mouse anti rat RT1B-PE                   | 1:400    | Biolegend                                                                              |
| Mouse anti CCR2-PE                       | 1:100    | R&D Systems                                                                            |
| Rabbit polyclonal anti S100              | 1:500    | Dako                                                                                   |
| Rabbit polyclonal anti NG2               | 1:200    | Merck Millipore                                                                        |



**Table B. List of primer sequences.**

| Name                  | Sequence |                           |
|-----------------------|----------|---------------------------|
| RPL19                 | Forward  | CCAAGGAAGCACGAAAGC        |
|                       | Reverse  | CCTCCTTGGACAGAGTCTTGA     |
| CCL2 (MCP-1)          | Forward  | CGGCTGGAGAACTACAAGAGA     |
|                       | Reverse  | TCTCTTGAGCTTGGTGACAAATA   |
| CCL3 (MIP1 $\alpha$ ) | Forward  | TCCACGAAAAATTCATTGCTG     |
|                       | Reverse  | AGATCTGCCGGTTTCTCTTG      |
| CCL4 (MIP1 $\beta$ )  | Forward  | CTCTGCGTGTCTGCCTTCT       |
|                       | Reverse  | GTGGGAGGGTCAGAGCCTAT      |
| CCL7                  | Forward  | TGAAGCCAGCCTTCTCTCTC      |
|                       | Reverse  | TGACATAGCAGCAAGTGGATG     |
| CCL12                 | Forward  | CCTTCTTTGCCTTCTGCTCA      |
|                       | Reverse  | GGATCTTCTGCTTAGCGACATT    |
| CCR2                  | Forward  | AAGAAGTATCCAAGAGCTTGATGAG |
|                       | Reverse  | TCACCATCATCATAGTCATACGG   |
| CCR5                  | Forward  | GAAGGTGAGACATCCGTTCC      |
|                       | Reverse  | TCGACCCCTTGAAAATCCATC     |
| TNF- $\alpha$         | Forward  | CAAACCACCAAGCAGAGGAG      |
|                       | Reverse  | GTGAGGAGCACATAGTCGGG      |
| IL-6                  | Forward  | AAAGCCAGAGTCATTGAGAGCA    |
|                       | Reverse  | AGGTTTGCCGAGTAGACCTCAT    |
| IL-1 $\beta$          | Forward  | TGTGATGAAAGACGGCACAC      |
|                       | Reverse  | CTTCTTCTTTGGGTATTGTTGG    |
| IL-10                 | Forward  | AGTGGAGCAGGTGAAGAATGA     |
|                       | Reverse  | TCATGGCCTTGTAGACACCTT     |
| r129                  | Forward  | CGGACCTCAGAACGGACATAC     |
|                       | Reverse  | TCTCTGCAGGATAGTTGGATCTTG  |

**Table C. Absolute numbers of GFP+ cells as determined by cell counting in various brain areas of interest at E17, E20 and P1 (see also Fig. 1).**

Each line corresponds to a single brain. For the sake of clarity, brains were given arbitrary numbers.

OB: olfactory bulbs; LV: lateral ventricles; CP: choroid plexi; Th: thalamic area; Hyp: hypothalamic area. ND: not determined.

|     |      | OB    | LV     | CP     | Th     | Hyp    |
|-----|------|-------|--------|--------|--------|--------|
| E17 | B1   | 0     | 4      | 5      | 8      | 2      |
|     | B2   | 0     | 6      | 3      | 2      | 7      |
|     | B3   | 1     | 5      | 14     | 1      | 0      |
|     | B4   | 2     | 3      | 15     | 0      | 0      |
|     | B5   | 0     | 4      | 39     | 3      | 1      |
|     | B6   | 1     | 5      | 12     | 0      | 0      |
|     | B7   | 2     | 4      | 14     | 1      | 4      |
|     | B8   | 0     | ND     | ND     | 9      | 0      |
|     | B9   | 1     | ND     | ND     | 1      | 1      |
|     | B10  | 0     | ND     | ND     | 0      | 1      |
|     | B11  | 0     | ND     | ND     | 2      | 3      |
|     | Mean | 0,64  | 4,45   | 14,57  | 2,45   | 1,73   |
|     | SEM  | 0,24  | 0,40   | 4,44   | 0,95   | 0,66   |
| E20 | B1   | 4     | 6      | 2      | 18     | 27     |
|     | B2   | 2     | 21     | 32     | 59     | 39     |
|     | B3   | 0     | 5      | 1      | 137    | 86     |
|     | B4   | 9     | 23     | 6      | 88     | 126    |
|     | B5   | 0     | 30     | 20     | 51     | 17     |
|     | B6   | 7     | 15     | 8      | 22     | 91     |
|     | B7   | 4     | ND     | ND     | 97     | 21     |
|     | B8   | 5     | ND     | ND     | 71     | 234    |
|     | B9   | 8     | ND     | ND     | 112    | 43     |
|     | B10  | 3     | ND     | ND     | ND     | ND     |
|     | B11  | 15    | ND     | ND     | ND     | ND     |
|     | Mean | 5,18  | 16,67  | 11,50  | 72,78  | 76,00  |
|     | SEM  | 1,33  | 4,04   | 4,95   | 13,30  | 23,32  |
| P1  | B1   | 37    | 33     | 49     | 119    | 94     |
|     | B2   | 1     | 210    | 97     | 491    | 141    |
|     | B3   | 8     | 86     | 99     | 556    | 467    |
|     | B4   | 2     | 53     | 36     | 285    | 175    |
|     | B5   | 1     | 97     | 112    | 59     | 215    |
|     | B6   | 2     | 226    | 110    | 302    | 197    |
|     | B7   | 26    | 33     | 264    | ND     | ND     |
|     | B8   | 9     | 256    | 96     | ND     | ND     |
|     | B9   | 2     | 279    | 224    | ND     | ND     |
|     | B10  | 14    | 283    | 157    | ND     | ND     |
|     | B11  | ND    | 363    | ND     | ND     | ND     |
|     | B12  | ND    | 539    | ND     | ND     | ND     |
|     | B13  | ND    | 530    | ND     | ND     | ND     |
|     | Mean | 10,20 | 229,79 | 124,43 | 301,87 | 214,95 |
| SEM | 3,89 | 47,85 | 22,73  | 80,27  | 53,45  |        |

**Table D. Absolute numbers of GFP+ cells and of GFP+ Iba1+ cells as determined by cell counting in the choroid plexi and in the lateral ventricles of RCMV-infected brains at E17, E20 and P1 (see also Fig. 2A).**

Each column corresponds to a single brain. For the sake of clarity, brains were given arbitrary numbers. ND: not determined.

|            |                            | Choroid Plexus |     |     |     |    |    |    | Lateral ventricle |     |     |     |     |     |    |
|------------|----------------------------|----------------|-----|-----|-----|----|----|----|-------------------|-----|-----|-----|-----|-----|----|
|            |                            | B1             | B2  | B3  | B4  | B5 | B6 | B7 | B1                | B2  | B3  | B4  | B5  | B6  | B7 |
| <b>E17</b> | Number of GFP+ cells       | 5              | 3   | 14  | 15  | 39 | 12 | 14 | 4                 | 6   | 5   | 3   | 4   | 5   | 4  |
|            | Number of GFP+ Iba1+ cells | 1              | 3   | 7   | 8   | 11 | 11 | 7  | 4                 | 5   | 3   | 3   | 3   | 2   | 3  |
|            | % of GFP+Iba1+ cells       | 20             | 100 | 50  | 53  | 28 | 92 | 50 | 93                | 82  | 57  | 96  | 81  | 40  | 75 |
| <b>E20</b> | Number of GFP+ cells       | 2              | 32  | 1   | 6   | 20 | 8  | ND | 6                 | 21  | 5   | 23  | 30  | 15  | 13 |
|            | Number of GFP+ Iba1+ cells | 2              | 15  | 1   | 5   | 17 | 3  | ND | 5                 | 4   | 1   | 8   | 12  | 13  | 11 |
|            | % of GFP+Iba1+ cells       | 100            | 47  | 100 | 83  | 85 | 38 | ND | 83                | 19  | 20  | 35  | 40  | 87  | 85 |
| <b>P1</b>  | Number of GFP+ cells       | 264            | 96  | 224 | 157 | ND | ND | ND | 256               | 279 | 283 | 363 | 539 | 530 | ND |
|            | Number of GFP+ Iba1+ cells | 214            | 67  | 117 | 96  | ND | ND | ND | 154               | 237 | 269 | 246 | 502 | 493 | ND |
|            | % of GFP+Iba1+ cells       | 81             | 70  | 52  | 61  | ND | ND | ND | 60                | 85  | 95  | 68  | 93  | 93  | ND |

**Table E. Absolute numbers of Iba1+ cells and of Iba1+ Ed1+ cells as determined by cell counting at E17 (see also Fig. 3A) and at P1 (see also Fig. 3B).**

Each column corresponds to a single brain. For the sake of clarity, brains were given arbitrary numbers. ND: not determined.

|     |     |                           | B1    | B2    | B3    | B4    | B5     | B6     | B7    | B8    | B9   | Mean  | SEM  |
|-----|-----|---------------------------|-------|-------|-------|-------|--------|--------|-------|-------|------|-------|------|
| E17 | MEM | Number of Iba1+ cells     | 24,0  | 23,0  | 30,0  | 58,0  | 40,0   | 60,0   | 20,0  | ND    | ND   | 36,4  | 6,3  |
|     |     | Number of Iba1+ED1+ cells | 2,0   | 2,0   | 12,0  | 11,0  | 9,0    | 8,0    | 5,0   | ND    | ND   | 7,0   | 1,5  |
|     |     | % of Iba1+ED1+ cells      | 8,3   | 8,7   | 40,0  | 19,0  | 22,5   | 13,3   | 25,0  | ND    | ND   | 19,5  | 4,2  |
|     | CMV | Number of Iba1+ cells     | 135,0 | 157,0 | 360,0 | 48,0  | 57,0   | 152,0  | 205,0 | ND    | ND   | 159,1 | 39,6 |
|     |     | Number of Iba1+ED1+ cells | 28,0  | 104,0 | 176,0 | 21,0  | 24,0   | 55,0   | 81,0  | ND    | ND   | 69,9  | 21,3 |
|     |     | % of Iba1+ED1+ cells      | 20,7  | 66,2  | 48,9  | 43,8  | 42,1   | 36,2   | 39,5  | ND    | ND   | 42,5  | 5,2  |
| P1  | MEM | Number of Iba1+ cells     | 174,0 | 354,0 | 524,0 | 209,0 | 228,0  | 263,0  | 185,0 | 173,0 | ND   | 263,8 | 42,8 |
|     |     | Number of Iba1+ED1+ cells | 16,0  | 22,0  | 31,0  | 17,0  | 20,0   | 16,0   | 13,0  | 11,0  | ND   | 18,3  | 2,2  |
|     |     | % of Iba1+ED1+ cells      | 9,2   | 6,2   | 5,9   | 8,1   | 8,8    | 6,1    | 7,0   | 6,4   | ND   | 7,2   | 0,5  |
|     |     | % of Amoeboid cells       | 21,1  | 8,5   | 11,5  | 23,9  | 26,3   | 7,6    | 21,9  | 13,7  | 26,9 | 16,8  | 2,6  |
|     | CMV | Number of Iba1+ cells     | 572,0 | 640,0 | 755,0 | 682,0 | 1279,0 | 1128,0 | 843,0 | 732,0 | ND   | 828,9 | 87,7 |
|     |     | Number of Iba1+ED1+ cells | 126,0 | 213,0 | 186,0 | 147,0 | 170,0  | 330,0  | 156,0 | 173,0 | ND   | 187,6 | 22,3 |
|     |     | % of Iba1+ED1+ cells      | 22,0  | 33,3  | 24,6  | 21,6  | 13,3   | 29,3   | 18,5  | 23,6  | ND   | 23,3  | 2,2  |
|     |     | % of Amoeboid cells       | 52,4  | 44,5  | 77,5  | 61,6  | 57,5   | 53,2   | 89,0  | 51,2  | 51,4 | 60,9  | 5,3  |
